# Supplementary material
Source: PubMed Central journal article supplement (PMC8553014)
Supplement: NIHMS1742283-supplement-1742283_SD_Fig5_unprocess.pdf [file NIHMS1742283-supplement-1742283_SD_Fig5_unprocess.pdf]

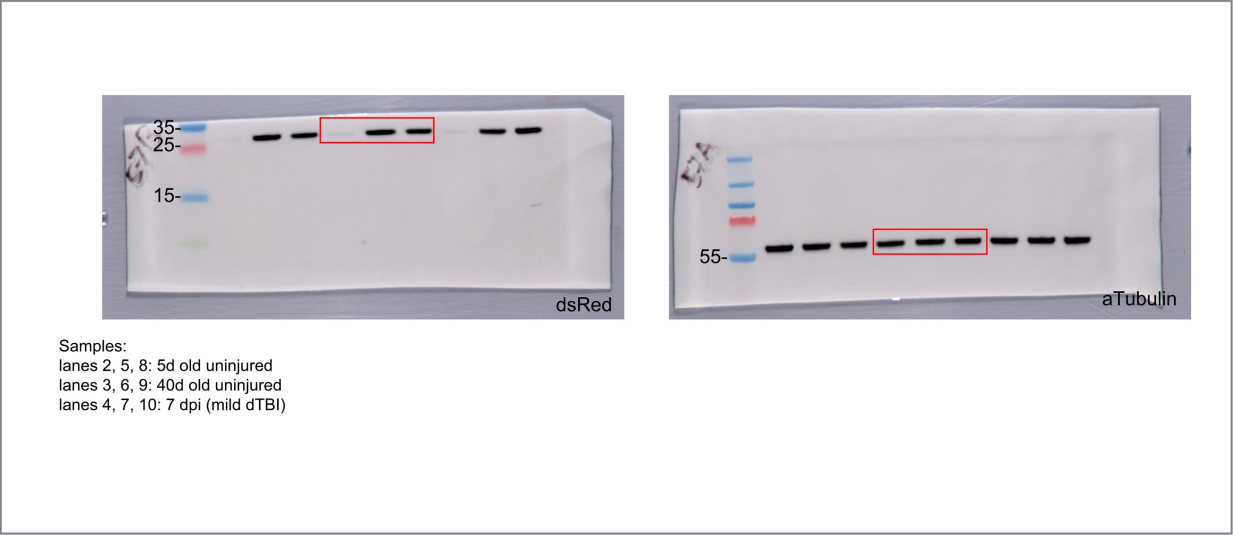

**Source Data for Figure 5f:** full uncropped western immunoblots with protein standards. The red box highlights the blots shown in Figure 5f (top), with the full blot showing all quantified biological replicates. The grey box indicates blots that were probed and re-stripped for multiple antigens. Molecular weights are labelled in kDa; protein ladder was PageRuler Plus Prestained Protein Ladder (Cat# 26619). Left most (ladder) is lane 1.
