# Supplementary material
Source: PubMed Central journal article supplement (PMC8553014)
Supplement: NIHMS1742283-supplement-1742283_Sup_info.pdf [file NIHMS1742283-supplement-1742283_Sup_info.pdf]

**Supplementary information**

---

**Glial AP1 is activated with aging and accelerated by traumatic brain injury**

---

In the format provided by the authors and unedited

**Supplementary Table 1 | Genotypes for figures and extended data figures**

| Figure                                   | Genotype (name in this paper)<br>See footnote <sup>b</sup>                                                    | Additional experiment notes                                           |
|------------------------------------------|---------------------------------------------------------------------------------------------------------------|-----------------------------------------------------------------------|
| Figure 1                                 | <i>w<sup>1118</sup></i>                                                                                       | -                                                                     |
| Figure 2                                 | <i>TREdsRed</i>                                                                                               | -                                                                     |
| Figure 3a                                | <i>TREdsRed</i><br><i>repoGS&gt;UAS-mCD8-GFP</i><br><i>elavGS&gt;UAS-mcd8-GFP</i>                             | geneSwitch (GS) flies maintained on RU486 for 3 d prior to collection |
| Figure 3b-e                              | <i>TREdsRed</i>                                                                                               | -                                                                     |
| Extended Data Fig. 3a,b                  | <i>repoGS, TREdsRed&gt;draper-RNAi</i>                                                                        | see footnote <sup>a</sup>                                             |
| Extended Data Fig. 3c                    | Experimental: <i>repoGS, TREdsRed&gt;draper-RNAi</i><br>WT: <i>repoGS, TREdsRed&gt;w<sup>1118</sup></i>       | see footnote <sup>a</sup>                                             |
| Figures 4a, 4c; Extended Data Fig. 3d,4d | <i>TREdsRed</i>                                                                                               | -                                                                     |
| Extended Data Fig. 3e                    | <i>draper-/-; w<sup>1118</sup> (WT)</i>                                                                       | -                                                                     |
| Figure 4b; Extended Data Fig. 3g         | <i>repoGS, TREdsRed&gt;basket-RNAi</i>                                                                        | see footnote <sup>a</sup>                                             |
| Extended Data Fig. 3h                    | <i>daGS, TREdsRed&gt;basket-RNAi</i>                                                                          | see footnote <sup>a</sup>                                             |
| Figure 4d                                | <i>repoGS, TREdsRed&gt;rolled-RNAi</i>                                                                        | see footnote <sup>a</sup>                                             |
| Figure 4e; Extended Data Fig. 4e         | <i>dFos-GFP</i>                                                                                               | -                                                                     |
| Figure 4f; Extended Data Fig. 4e         | <i>dJun-GFP</i>                                                                                               | -                                                                     |
| Figure 4f; Extended Data Fig. 4c         | <i>repoGS, TREdsRed&gt;UAS-puckered</i>                                                                       | see footnote <sup>a</sup>                                             |
| Figure 4h                                | Experimental: <i>repoGS, TREdsRed&gt;UAS-puckered</i><br>WT: <i>repoGS, TREdsRed&gt;w<sup>1118</sup></i>      | see footnote <sup>a</sup>                                             |
| Figure 4g                                | Experimental: <i>repoGS&gt;UAS-puckered</i><br>WT: <i>repoGS&gt;w<sup>1118</sup></i>                          | Flies flipped to RU486 or vehicle at 12 dpi                           |
| Extended Data Fig. 4e                    | Experimental: <i>repoGS&gt;UAS-puckered</i><br>Control: <i>repoGS&gt;w<sup>1118</sup></i>                     | see footnote <sup>a</sup>                                             |
| Figure 4j-n                              | <i>repoGS&gt;UAS-puckered</i>                                                                                 | see footnote <sup>a</sup>                                             |
| Extended Data Fig. 4h                    | Experimental: <i>repoGS&gt;ERK-RNAi</i><br>Control: <i>repoGS&gt;w<sup>1118</sup></i>                         | Flies flipped to RU486 or vehicle at 12 dpi                           |
| Extended Data Fig. 4i                    | <i>daGS&gt;ERK-RNAi</i>                                                                                       | see footnote <sup>a</sup>                                             |
| Extended Data Fig. 5a                    | <i>Ets21c-GFP</i>                                                                                             | -                                                                     |
| Extended Data Fig. 5b                    | <i>repoGS&gt;Ets21c-RNAi</i>                                                                                  | see footnote <sup>a</sup>                                             |
| Extended Data Fig. 5c,d                  | <i>elavGS&gt;UAS-puckered</i>                                                                                 | see footnote <sup>a</sup>                                             |
| Extended Data Fig. 5e                    | <i>repoGS&gt;basket-RNAi</i>                                                                                  | see footnote <sup>a</sup>                                             |
| Figure 5                                 | <i>TREdsRed</i>                                                                                               | -                                                                     |
| Figure 6a,b;<br>Extended Data Fig. 6b-d  | <i>repoGS&gt;UAS-0N4R</i>                                                                                     | see footnote <sup>a</sup>                                             |
| Extended Data Fig. 6a                    | <i>elavGS&gt;UAS-0N4R</i>                                                                                     | see footnote <sup>a</sup>                                             |
| Figure 6c,d                              | Experimental: <i>repoGS, UAS-0N4R&gt;UAS-puckered</i><br>Control: <i>repoGS, UAS-0N4R&gt;w<sup>1118</sup></i> | Flies flipped to RU486 at 3 dpi                                       |
| Extended Data Fig. e-g                   | Experimental: <i>repoGS, 0N4R&gt;dFos-DN</i><br>Control: <i>repoGS, UAS-0N4R &gt;w<sup>1118</sup></i>         | Flies flipped to RU486 at 3 dpi                                       |

<sup>a</sup> 0 d males maintained on RU486 or vehicle from 3 d prior to experimentation

<sup>b</sup> Detailed genotypes of fly lines used in Supplementary Table 2. Carrot (>) indicates that lines from Supplementary Table 2 were crossed to achieve the indicated animals, thus the genotypes are heterozygous over a wildtype chromosome.

**Supplementary Table 2. *Drosophila* genotype information**

| Name in this paper      | ID**            | Full Genotype                                                                                  | Reference                   | Notes                                                        |
|-------------------------|-----------------|------------------------------------------------------------------------------------------------|-----------------------------|--------------------------------------------------------------|
| <i>w<sup>1118</sup></i> | RRID:BDSC_5905  | <i>w[1118]</i>                                                                                 | -                           | -                                                            |
| <i>basket-RNAi</i>      | RRID:BDSC_53310 | <i>y[1] sc[*] v[1] sev[21];;P{y[+t7.7] v[+t1.8]=TRiP.HMC03539}attP2</i>                        | -                           | -                                                            |
| <i>daGS, TREdsRed</i>   | -               | <i>w[1118]/w[*];daughterlessGeneSwitch[+mc], P{y[+t7.7] w[+mC]=TRE-DsRedT4}attP16/Sm6a,Cy;</i> | this paper                  | -                                                            |
| <i>draper-/-</i>        | RRID:BDSC_67033 | <i>draper<sup>Δ5</sup></i>                                                                     | -                           | Courtesy of Marc Freeman                                     |
| <i>draper-RNAi</i>      | RRID:BDSC_67034 | <i>y[1] w[*]; P{w[+mC]=UAS-drpr.dsRNA}2/CyO</i>                                                | -                           | -                                                            |
| <i>dFos-DN</i>          | RRID_BDSC_38657 | <i>w[1118]; PBac{y[+mDint2] w[+mC]=kay-GFP.FLAG}VK00037</i>                                    | -                           | -                                                            |
| <i>dJun-GFP</i>         | RRID_BDSC_50755 | <i>w[1118]; PBac{y[+mDint2] w[+mC]=Jra-GFP.FLAG}VK00033/TM3, Sb[1]</i>                         | -                           | -                                                            |
| <i>elavGS</i>           | -               | <i>y*w*;;elavGeneSwitch</i>                                                                    | -                           | -                                                            |
| <i>ERK-RNAi</i>         | RRID_BDSC_34855 | <i>y[1] sc[*] v[1] sev[21]; P{y[+t7.7] v[+t1.8]=TRiP.HMS00173}attP2</i>                        | -                           | -                                                            |
| <i>Ets21c-GFP</i>       | RRID_BDSC_38639 | <i>w[1118]; PBac{y[+mDint2] w[+mC]=Ets21c-GFP.FLAG}VK00033/TM3, Sb[1]</i>                      | -                           | -                                                            |
| <i>Ets21c-RNAi</i>      | RRID:BDSC_39069 | <i>y[1] sc[*] v[1] sev[21]; P{y[+t7.7] v[+t1.8]=TRiP.HMS01989}attP2</i>                        | -                           | -                                                            |
| <i>MREdsRed</i>         | RRID:BDSC_59013 | <i>w[*]; P{y[+t7.7] w[+mC]=mRE-DsRedT4}attP40</i>                                              | Chatterjee & Bohmann, 2012. | -                                                            |
| <i>repoGS*</i>          | -               | <i>w<sup>1118</sup>;;P{repoGS}attP154</i>                                                      | -                           | Courtesy of Herve Tricoire; referred to as <i>repoGS2301</i> |
| <i>repoGS, TREdsRed</i> | -               | <i>w[1118]/w[*]; P{repoGeneSwitch}attP40, P{y[+t7.7] w[+mC]=TRE-DsRedT4}attP16/Sm6a,Cy;</i>    | This paper                  | Courtesy of Herve Tricoire; referred to as <i>repoGS16</i>   |
| <i>repoGS,UAS-0N4R</i>  | -               | <i>w[1118];; P{repoGeneSwitch}attP154, UAS-tau.WT (0N4R)/Tm6c,Sb[1]</i>                        | This paper                  | -                                                            |
| <i>rolled-RNAi</i>      | RRID:BDSC_34855 | <i>y[1] sc[*] v[1] sev[21]; P{y[+t7.7] v[+t1.8]=TRiP.HMS00173}attP2 ]</i>                      | -                           | -                                                            |
| <i>TREdsRed</i>         | RRID:BDSC_59012 | <i>w[*]; P{y[+t7.7] w[+mC]=TRE-DsRedT4}attP16</i>                                              | Chatterjee & Bohmann, 2012. | Courtesy of Marc Freeman                                     |
| <i>UAS-mcd8-GFP</i>     | -               | <i>yw; UAS-mCD8-GFP/CyO;</i>                                                                   | -                           | -                                                            |
| <i>UAS-puckered</i>     | -               | <i>y-w-;;UAS-puckered</i>                                                                      | -                           | Courtesy of Marc Freeman                                     |
| <i>UAS-0N4R</i>         | -               | <i>w[1118];;UAS-tau.WT (0N4R)</i>                                                              | -                           | Courtesy of Mel Feany                                        |

**Supplementary Table 3 | Primer sequences**

| Target gene              | Assay | Forward Primer (5' to 3') | Reverse Primer (5' to 3') | Reference <sup>a</sup> |
|--------------------------|-------|---------------------------|---------------------------|------------------------|
| geneSwitch               | PCR   | gggctacgaagtcaaacc        | tctgccagaaggaaacacc       | Goodman et al., 2019   |
| pUAS                     | PCR   | agcaaccaagtaaatcaactgc    | ttcatcagttccataggttg      | Goodman et al., 2019   |
| basket                   | qPCR  | tacggcccataggatcagggtg    | tgctgggtgatagatcgtgaag    | PA60065                |
| dsRed                    | qPCR  | ccgaggacgtcatcaaggagtt    | accttcagcttgccggtctg      | This paper             |
| draper                   | qPCR  | gcagatgcctgaataactcctc    | tccttcattccatgccgtag      | PP31489                |
| dorsal                   | qPCR  | atccgtgtggatccgtttaa      | aatcgaccgaattcagatc       | PD70364                |
| dFos                     | qPCR  | agaccggccagagtgttct       | gccagtgctcctcgatg         | PP6106                 |
| Ets21c                   | qPCR  | caacgacgacgaaccaa         | ggtcgcgttgacgaatc         | doi:10.1038/srep34725  |
| MMP1                     | qPCR  | gaaggctcggacaacgag        | gtcgttgactggatgacg        | doi:10.1038/srep34725  |
| puckered                 | qPCR  | gccacatcagaacatcaagc      | ccgtttccgtgcatctt         | doi:10.1038/srep34725  |
| RpL32<br>(house keeping) | qPCR  | tgtcctccagcttaagatgaccatc | ctgggctgcgccattgtg        | Gabler et al., 2004    |
| upd2                     | qPCR  | tttccggcaaatcagagatcc     | gcgcttgataactcgtccttg     | PP29178                |

<sup>a</sup>Pxxxxxx refers to IDs from FlyPrimerBank (<https://www.flyrnai.org/flyprimerbank>)

Yanhui Hu, Richelle Sopko, Marianna Foos, Colleen Kelley, Ian Flockhart, Noemie Ammeux, Xiaowei Wang, Lizbeth Perkins, Norbert Perrimon, and Stephanie E Mohr. 2013. "FlyPrimerBank: an online database for *Drosophila melanogaster* gene expression analysis and knockdown evaluation of RNAi reagents." *G3* (Bethesda), 3, 9, Pp. 1607-16.

**Supplementary Table 4 | Antibody information**

| Antigen                         | Source and catalog #                               | Lot #            | Western immunoblot dilution | Whole mount IF dilution | Paraffin IF dilution |
|---------------------------------|----------------------------------------------------|------------------|-----------------------------|-------------------------|----------------------|
| Primary antibodies              |                                                    |                  |                             |                         |                      |
| aTubulin                        | DHSB, AA4.3                                        | 11/5/15-51ug/ml  | 1:10,000                    | -                       | -                    |
| AT100                           | Invitrogen, MN1060                                 | UH2803903        | -                           | -                       | 1:100                |
| AT8                             | Invitrogen, MN1020                                 | UH2805521        | -                           | -                       | 1:100                |
| dsRed                           | ThermoFisher, MA515257                             | TE264883         | 1:1000                      | -                       | -                    |
| elav                            | DSHB, Rat-Elav-7E8A10                              | 12/27/18-23ug/ml | -                           | 1:20                    | -                    |
| ERK                             | Sigma, 5670                                        | 21190726         | 1:5000                      | -                       | -                    |
| GFP                             | Invitrogen, A11122                                 |                  | -                           | 1:500                   |                      |
| Tau                             | DAKO, A0024                                        | 20024929         | 1:20,000                    | -                       | -                    |
| JNK                             | Santa Cruz Biotechnology, sc571 (discontinued now) | J209             | 1:500                       | -                       | -                    |
| pERK                            | Cell Signaling, 4370                               | 24               | 1:2000                      | -                       | -                    |
| pJNK                            | Promega, V7931                                     | L019             | 1:5000                      | -                       | 1:200                |
| repo                            | DSHB, 8D12                                         | 12/6/19-54ug/ml  | -                           | 1:5                     | -                    |
| Secondary antibodies            |                                                    |                  |                             |                         |                      |
| Goat anti-rabbit AlexaFluor 488 | Invitrogen, A11008                                 | 1911238          | -                           | 1:200                   | 1:200                |
| Goat anti-mouse AlexaFluor 488  | Invitrogen, A32723                                 | 2120125          | -                           | 1:200                   | 1:200                |
| Goat anti-rat AlexaFluor 546    | Invitrogen, A-111081                               | 1921310          | -                           | 1:200                   | 1:200                |
| Goat anti-mouse AlexaFluor 594  | Invitrogen, A11032                                 | 1887003          | -                           | 1:200                   | 1:200                |
| Goat anti-mouse AlexaFluor 647  | Invitrogen, A21236                                 | 2011576          | -                           | 1:200                   | 1:200                |
| Goat anti-rabbit HRP            | Jackson ImmunoResearch, 111-035-144                | 127629           | 1:5000                      | -                       | -                    |
| Goat anti-mouse IgG H&L HRP     | Abcam, ab6789                                      | NA               | 1:5000                      | -                       | -                    |
